# Supplementary material for: Active Confinement of Masonry Walls with Stainless Steel Straps: The Effect of Strap Arrangement on the in-Plane Behavior of Strength, Poisson’s Ratio and Pseudo-Ductility
Source: Preprints.org preprint supplement (doi:10.20944/preprints202310.1667.v2), 2023-11-29
Supplement: Supplementary file 1 [file supplementary]

|  |  |
| --- | --- |
| (**a**) | (**b**) |

**Figure S1.** Special stainless steel elements for masonry protection: (**a**) Along the edges at wall ends (rounded angles); (**b**) Along the edges generated by the perforations (funnel plates).

**Figure S2.** Four stainless steel straps of the CAM® System sharing the same perforation.


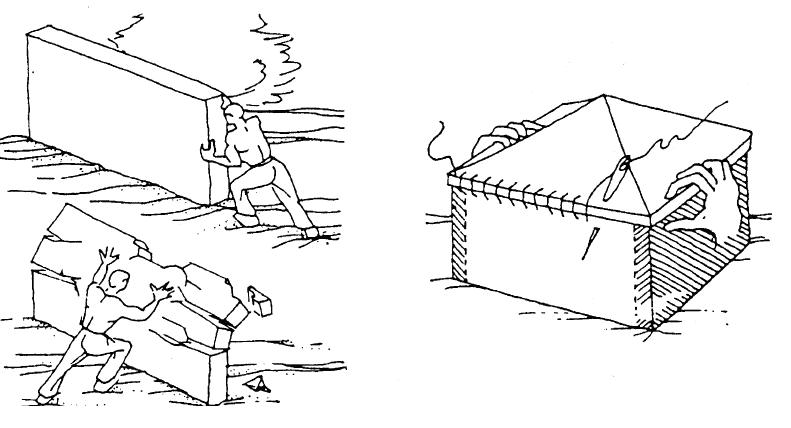


**Figure S3.** Box-type behavior: by tying all the construction elements together, the building behaves as a single unit.

**Figure S1.** Stress transfer mechanism from a loop-shaped stainless steel strap placed in tension to the masonry enclosed within it.
